# Supplementary material for: Genome-wide Generation and Systematic Phenotyping of Knockout Mice Reveals New Roles for Many Genes
Source: PubMed Central journal article supplement — Cell. 2013 Jul 18;154(2):452–64. doi: 10.1016/j.cell.2013.06.022 (PMC3717207; doi:10.1016/j.cell.2013.06.022), 2013-07-18
Supplement: mmc7.pdf [file mmc7.pdf]

**Table S7. Key to Individual Variables (left to right), Related to Figure 5E**

| <u>Index</u> | <u>Variable</u>                    | <u>Index</u> | <u>Variable</u>                          |
|--------------|------------------------------------|--------------|------------------------------------------|
| 1            | <b>Homozygous Viability at P14</b> | 68           | Ventral coat                             |
| 2            | <b>Fertility</b>                   | 69           | Vibrissae                                |
| 3            | <b>ABR Threshold</b>               | 70           | Vibrissae Absent                         |
|              | <b>Body Composition (DEXA)</b>     | 71           | Vibrissae Curly                          |
| 4            | Body Weight                        | 72           | Vibrissae Disorientated                  |
| 5            | Bone Mineral Content               | 73           | Vibrissae Long                           |
| 6            | Bone Mineral Density               | 74           | Vibrissae Short                          |
| 7            | Fat Mass                           | 75           | Whiskers                                 |
| 8            | Fat Percentage Estimate            | 76           | <b>Erythrocyte micronuclei</b>           |
| 9            | Lean Mass                          |              | <b>Eye Morphology</b>                    |
| 10           | Nose to Tailbase Length            | 77           | Blood Presence                           |
|              | <b>Citrobacter Challenge</b>       | 78           | Cornea                                   |
| 11           | Bacterial Shedding                 | 79           | Cornea Opacity                           |
| 12           | Ceacal Contents                    | 80           | Cornea Vascularization                   |
| 13           | Ceacal Patch                       | 81           | Eyelid Closure                           |
| 14           | Ceacum                             | 82           | Eyes Bulging                             |
| 15           | Colon                              | 83           | Iris Pigment                             |
| 16           | Colon Weight                       | 84           | Left Eye Blood Vessels                   |
| 17           | Liver                              | 85           | Left Eye Blood Vessels Pattern           |
| 18           | Spleen                             | 86           | Left Eye Blood Vessels Structure         |
|              | <b>Dysmorphology</b>               | 87           | Left Optic Disc                          |
| 19           | Anagen Phase                       | 88           | Left Retina                              |
| 20           | Coat Colouration                   | 89           | Left Retina Pigmentation                 |
| 21           | Coat Intact                        | 90           | Left Retina Structure                    |
| 22           | Coat Texture                       | 91           | Left eye Bergmeister's Papilla           |
| 23           | Dorsal Coat                        | 92           | Lens                                     |
| 24           | Dorsal Coat Coarse                 | 93           | Lens Opacity (non suture or snowflake)   |
| 25           | Dorsal Coat Fine                   | 94           | Pupil                                    |
| 26           | Dorsal Coat Long                   | 95           | Pupil Dilation                           |
| 27           | Dorsal Coat Rough                  | 96           | Pupil Light Response                     |
| 28           | Dorsal Coat Short                  | 97           | Pupil Position                           |
| 29           | Dorsal Coat Skin Visible           | 98           | Pupil Shape                              |
| 30           | Dorsal Coat Sparse                 | 99           | Right Eye Blood Vessels                  |
| 31           | Ear Morphology                     | 100          | Right Eye Blood Vessels Pattern          |
| 32           | Ear Size                           | 101          | Right Eye Blood Vessels Structure        |
| 33           | Eye Colouration                    | 102          | Right Optic Disc                         |
| 34           | Eye Size                           | 103          | Right Retina                             |
| 35           | Eyes                               | 104          | Right Retina Pigmentation                |
| 36           | Forelimb Size                      | 105          | Right Retina Structure                   |
| 37           | Forepaw Foot Pads                  | 106          | Right eye Bergmeister's Papilla          |
| 38           | Forepaw Nails                      |              | <b>Glucose Tolerance (ip)</b>            |
| 39           | Forepaw Size                       | 107          | Fasted Plasma Glucose                    |
| 40           | Genitalia                          | 108          | ip-GTT                                   |
| 41           | Genitalia Morphology               |              | <b>Grip Strength</b>                     |
| 42           | Genitalia Size                     | 109          | All Paws Trial 1                         |
| 43           | Guard Hairs                        | 110          | All Paws Trial 2                         |
| 44           | Hair Behind Ears                   | 111          | All Paws Trial 3                         |
| 45           | Hair On Tail                       | 112          | Fore Paws Trial 1                        |
| 46           | Head Morphology                    | 113          | Fore Paws Trial 2                        |
| 47           | Head Size                          | 114          | Fore Paws Trial 3                        |
| 48           | Hind Paw Size                      |              | <b>Haematology</b>                       |
| 49           | Hindlimb Foot Pads                 | 115          | (CBC) Haematocrit                        |
| 50           | Hindlimb Nails                     | 116          | (CBC) Haemoglobin                        |
| 51           | Hindlimb Size                      | 117          | (CBC) Mean Corpuscular Haemoglobin       |
| 52           | Incisor                            | 118          | (CBC) Mean Corpuscular Haemoglobin Conc. |
| 53           | Incisor Colour                     | 119          | (CBC) Mean Corpuscular Volume            |
| 54           | Mouth Morphology                   | 120          | (CBC) Mean Platelet Volume               |
| 55           | Skin Condition                     | 121          | (CBC) Platelet Count                     |
| 56           | Skin Pigmentation                  | 122          | (CBC) Red Blood Cell Count               |
| 57           | Snout Morphology                   | 123          | (CBC) Red Blood Cell Distribution Width  |
| 58           | Tail Length                        | 124          | (CBC) White Blood Cell Count             |
| 59           | Tail Morphology                    | 125          | <b>Heart Weight</b>                      |
| 60           | Tail Tip Hairs                     | 126          | <b>Hot Plate Latency to respond</b>      |
| 61           | Ventral Coat Coarse                |              | <b>Indirect Calorimetry</b>              |
| 62           | Ventral Coat Fine                  | 127          | Cumulative Food Intake                   |
| 63           | Ventral Coat Long                  | 128          | Energy Expenditure                       |
| 64           | Ventral Coat Rough                 | 129          | Energy Expenditure/Animal                |
| 65           | Ventral Coat Short                 | 130          | Respiratory Exchange Ratio               |
| 66           | Ventral Coat Skin Visible          | 131          | VCO2                                     |
| 67           | Ventral Coat Sparse                | 132          | VO2                                      |

| <u>Index</u> | <u>Variable</u>                         |
|--------------|-----------------------------------------|
| 133          | Water Intake                            |
| 134          | X-Activity Ambulatory                   |
| 135          | X-Activity Total                        |
|              | <b>Modified SHIRPA</b>                  |
| 136          | Body Position                           |
| 137          | Contact Righting Reflex                 |
| 138          | Convulsions                             |
| 139          | Corneal Touch Reflex                    |
| 140          | Evidence of Biting                      |
| 141          | Gait (inc. Ataxia)                      |
| 142          | Headbobbing/Circling                    |
| 143          | Lacrimation                             |
| 144          | Limb Grasping                           |
| 145          | Locomotor Activity                      |
| 146          | Palpebral Closure                       |
| 147          | Pelvic Elevation                        |
| 148          | Pinna Touch Reflex                      |
| 149          | Positional Passivity                    |
| 150          | Startle Response                        |
| 151          | Tail Elevation                          |
| 152          | Touch Escape                            |
| 153          | Transfer Arousal                        |
| 154          | Tremor                                  |
| 155          | Trunk Curl                              |
| 156          | Vocalisation                            |
|              | <b>Open Field</b>                       |
| 157          | % Distance Moved in Centre - Total      |
| 158          | % Time Spent in Centre - Total          |
| 159          | Average Speed at Centre                 |
| 160          | Average Speed at Periphery              |
| 161          | Latency To Enter Centre                 |
| 162          | Number Entries to Centre                |
| 163          | Total Distance Travelled - Centre       |
| 164          | Total Distance Travelled - Periphery    |
| 165          | Total Distance Travelled Whole Arena    |
| 166          | Total Rears                             |
| 167          | Total Rest Time at Periphery            |
| 168          | Total Resting Time in Centre            |
| 169          | Total Time at Periphery                 |
| 170          | Total Time in Centre                    |
| 171          | Whole Arena Average Speed               |
| 172          | Whole Arena Resting Time                |
|              | <b>Peripheral blood lymphocyte FACS</b> |
| 173          | Total T cell                            |
| 174          | T helper                                |
| 175          | T cytotoxic                             |
| 176          | T regulatory                            |
| 177          | Activated T helper                      |
| 178          | Activated T cytotoxic                   |
| 179          | NK                                      |
| 180          | NKT                                     |
| 181          | <b>Total B cell</b>                     |
| 182          | <b>Mature B cell</b>                    |
| 183          | <b>Monocytes</b>                        |
| 184          | <b>Granulocytes</b>                     |
|              | <b>Plasma Chemistry</b>                 |
| 185          | Alanine Aminotransferase                |
| 186          | Albumin                                 |
| 187          | Alkaline Phosphatase                    |
| 188          | Amylase                                 |
| 189          | Aspartate Aminotransferase              |
| 190          | Calcium                                 |
| 191          | Chloride                                |
| 192          | Cholesterol                             |
| 193          | Creatine Kinase                         |
| 194          | Creatinine                              |
| 195          | Fructosamine                            |
| 196          | Glucose                                 |
| 197          | Glycerol                                |
| 198          | High Density Lipoprotein                |

| <u>Index</u> | <u>Variable</u>                    |
|--------------|------------------------------------|
| 199          | Iron                               |
| 200          | Lactate Dehydrogenase              |
| 201          | Low Density Lipoprotein            |
| 202          | Magnesium                          |
| 203          | NEFAC                              |
| 204          | Phosphate                          |
| 205          | Potassium                          |
| 206          | Sodium                             |
| 207          | Total Bilirubin                    |
| 208          | Total Protein                      |
| 209          | Triglycerides                      |
| 210          | Urea                               |
| 211          | Uric Acid                          |
|              | <b>Salmonella Challenge</b>        |
| 212          | Ceecal Contents                    |
| 213          | Liver                              |
| 214          | Spleen                             |
|              | <b>Stress Induced Hyperthermia</b> |
| 215          | Basal Body Temperature             |
| 216          | Change in Temperature              |
| 217          | Post Stress Temperature            |
| 218          | <b>Weight Curve</b>                |
|              | <b>X-ray Imaging</b>               |
| 219          | Brachydactylism                    |
| 220          | Clavicle                           |
| 221          | Digit Integrity                    |
| 222          | Femur                              |
| 223          | Fibula                             |
| 224          | Fusion of Processes                |
| 225          | Fusion of Ribs                     |
| 226          | Fusion of Vertebrae                |
| 227          | Humerus                            |
| 228          | Joints                             |
| 229          | Kyphosis                           |
| 230          | Lordosis                           |
| 231          | Mandible                           |
| 232          | Maxilla                            |
| 233          | Number of Caudal Vertebrae         |
| 234          | Number of Cervical Vertebrae       |
| 235          | Number of Digits                   |
| 236          | Number of Lumbar Vertebrae         |
| 237          | Number of Pelvic Vertebrae         |
| 238          | Number of Ribs Left                |
| 239          | Number of Ribs Right               |
| 240          | Number of Thoracic Vertebrae       |
| 241          | Pelvis                             |
| 242          | Polysyndactylism                   |
| 243          | Processes on Vertebrae             |
| 244          | Radius                             |
| 245          | Scapula                            |
| 246          | Scoliosis                          |
| 247          | Shape of Ribcage                   |
| 248          | Shape of Ribs                      |
| 249          | Shape of Spine                     |
| 250          | Shape of Vertebrae                 |
| 251          | Skull Shape                        |
| 252          | Spinous Processes                  |
| 253          | Syndactylism                       |
| 254          | Teeth                              |
| 255          | Tibia                              |
| 256          | Transitional Vertebrae             |
| 257          | Transverse Processes               |
| 258          | Ulna                               |
| 259          | Zygomatic Bone                     |
|              | <b>External collaboration</b>      |
| 260          | Eye histopathology                 |
| 261          | Brain histopathology               |
| 262          | Skin histopathology                |
| 263          | Tail epidermis wholemount          |
