# Supplementary material for: Genome-wide Generation and Systematic Phenotyping of Knockout Mice Reveals New Roles for Many Genes
Source: PubMed Central journal article supplement — Cell. 2013 Jul 18;154(2):452–64. doi: 10.1016/j.cell.2013.06.022 (PMC3717207; doi:10.1016/j.cell.2013.06.022), 2013-07-18
Supplement: mmc8.pdf [file mmc8.pdf]

## FULL AUTHOR LIST

Jacqueline K White<sup>1</sup>, Anna-Karin Gerdin<sup>1</sup>, Natasha A Karp<sup>1</sup>, Ed Ryder<sup>1</sup>, Marija Buljan<sup>1</sup>, James N Bussell<sup>1</sup>, Jennifer Salisbury<sup>1</sup>, Simon Clare<sup>1</sup>, Neil J Ingham<sup>1</sup>, Christine Podrini<sup>1</sup>, Richard Houghton<sup>1</sup>, Jeanne Estabel<sup>1</sup>, Joanna R Bottomley<sup>1</sup>, David G Melvin<sup>1</sup>, David Sunter<sup>1</sup>, Niels C Adams<sup>1</sup>, The Sanger Institute Mouse Genetics Project<sup>1, 2, 3, 5, 6,\*</sup>, David Tannahill<sup>1</sup>, Darren W Logan<sup>1</sup>, Daniel G MacArthur<sup>1</sup>, Jonathan Flint<sup>2</sup>, Vinit B Mahajan<sup>3</sup>, Stephen H Tsang<sup>4</sup>, Ian Smyth<sup>5</sup>, Fiona M Watt<sup>6</sup>, William C Skarnes<sup>1</sup>, Gordon Dougan<sup>1</sup>, David J Adams<sup>1</sup>, Ramiro Ramirez-Solis<sup>1</sup>, Allan Bradley<sup>1</sup>, and Karen P Steel<sup>1,7#</sup>

### \*The Sanger Institute Mouse Genetics Project

#### Phenotyping team:

Lauren Baker<sup>1</sup>, Caroline Barnes<sup>1</sup>, Ryan Beveridge<sup>1</sup>, Emma Cambridge<sup>1</sup>, Damian Carragher<sup>1</sup>, Prabhjoat Chana<sup>1</sup>, Kay Clarke<sup>1</sup>, Yvette Hooks<sup>1</sup>, Natalia Igosheva<sup>1</sup>, Ozama Ismail<sup>1</sup>, Hannah Jackson<sup>1</sup>, Leanne Kane<sup>1</sup>, Rosalind Lacey<sup>1</sup>, David Tino Lafont<sup>1</sup>, Mark Lucas<sup>1</sup>, Simon Maguire<sup>1</sup>, Katherine McGill<sup>1</sup>, Rebecca E McIntyre<sup>1</sup>, Sophie Messenger<sup>1</sup>, Lynda Mottram<sup>1</sup>, Lee Mulderrig<sup>1</sup>, Selina Pearson<sup>1</sup>, Hayley J Protheroe<sup>1</sup>, Laura-Anne Roberson<sup>1</sup>, Grace Salisbury<sup>1</sup>, Mark Sanderson<sup>1</sup>, Daniel Sanger<sup>1</sup>, Carl Shannon<sup>1</sup>, Paul C Thompson<sup>1</sup>, Elizabeth Tuck<sup>1</sup>, Valerie E Vancollie<sup>1</sup>

#### Genotyping and targeting team:

Lisa Brackenbury<sup>1</sup>, Wendy Bushell<sup>1</sup>, Ross Cook<sup>1</sup>, Priya Dalvi<sup>1</sup>, Diane Gleeson<sup>1</sup>, Bishoy Habib<sup>1</sup>, Matt Hardy<sup>1</sup>, Kifayathullah Liakath Ali<sup>1</sup>, Evelina Miklejewska<sup>1</sup>, Stacey Price<sup>1</sup>, Debarati Sethi<sup>1</sup>, Elizabeth Trenchard<sup>1</sup>, Dominique von Schiller<sup>1</sup>, Sapna Vyas<sup>1</sup>, Anthony P West<sup>1</sup>, John Woodward<sup>1</sup>, Elizabeth Wynn<sup>1</sup>

#### Mouse Informatics:

Arthur Evans<sup>1</sup>, David Gannon<sup>1</sup>, Mark Griffiths<sup>1</sup>, Simon Holroyd<sup>1</sup>, Vivek Iyer<sup>1</sup>, Christian Kipp<sup>1</sup>, Morag Lewis<sup>1</sup>, Wei Li<sup>1</sup>, Darren Oakley<sup>1</sup>, David Richardson<sup>1</sup>, Damian Smedley<sup>1</sup>

#### Tissue culture team:

Chukwuma Agu<sup>1</sup>, Jackie Bryant<sup>1</sup>, Liz Delaney<sup>1</sup>, Nadia I Gueorguieva<sup>1</sup>, Helen Tharagonnet<sup>1</sup>, Anne J Townsend<sup>1</sup>

#### Mouse Production team:

Daniel Biggs<sup>1</sup>, Ellen Brown<sup>1</sup>, Adam Collinson<sup>1</sup>, Charles-Etienne Dumeau<sup>1</sup>, Evelyn Grau<sup>1</sup>, Sarah Harrison<sup>1</sup>, James Harrison<sup>1</sup>, Catherine E Ingle<sup>1</sup>, Helen Kundi<sup>1</sup>, Alla Madich<sup>1</sup>, Danielle Mayhew<sup>1</sup>, Tom Metcalf<sup>1</sup>, Stuart Newman<sup>1</sup>, Johanna Pass<sup>1</sup>, Laila Pearson<sup>1</sup>, Helen Reynolds<sup>1</sup>, Caroline Sinclair<sup>1</sup>, Hannah Wardle-Jones<sup>1</sup>, Michael Woods<sup>1</sup>

#### Mouse Facility team:

Liam Alexander<sup>1</sup>, Terry Brown<sup>1</sup>, Francesca Flack<sup>1</sup>, Carole Frost<sup>1</sup>, Nicola Griggs<sup>1</sup>, Silvia Hrnčiarova<sup>1</sup>, Andrea Kirton<sup>1</sup>, Jordan McDermott<sup>1</sup>, Claire Rogerson<sup>1</sup>, Gemma White<sup>1</sup>, Pawel Zielezinski<sup>1</sup>

#### Collaborators:

Tia DiTommaso<sup>5</sup>, Andrew Edwards<sup>2</sup>, Emma Heath<sup>6</sup>, Mary Ann Mahajan<sup>3</sup>, Binnaz Yalcin<sup>2</sup>

1. Wellcome Trust Sanger Institute, Hinxton, Cambridge CB10 1SA, UK
2. Wellcome Trust Centre for Human Genetics, Oxford, OX3 7BN, UK
3. Omics Laboratory, University of Iowa, Iowa City, IA 52242, USA

4. Harkness Eye Institute, Columbia University, New York, NY 10032, USA
  5. Monash University, Melbourne, Victoria 3800, Australia
  6. Wellcome Trust Centre for Stem Cell Research, University of Cambridge, Cambridge, CB2 1QR UK
  7. Wolfson Centre for Age-Related Diseases, King's College London, Guy's Campus, London SE1 1UL, UK
- # Corresponding and senior author
